# Supplementary material for: MOF-derived Ni-based nanocomposites as robust catalysts for chemoselective hydrogenation of functionalized nitro compounds
Source: Royal Society of Chemistry journal article supplement (doi:10.1039/c6ra26699a), 2017-01-01
Supplement: c6ra26699a1.pdf [file c6ra26699a1.pdf]

# **MOF-derived Ni-based nanocomposites as robust catalysts for chemoselective hydrogenation of functionalized nitro compounds**

Bo Tang,<sup>a</sup> Wei-Chao Song,<sup>a</sup> En-Cui Yang<sup>\*a</sup> and Xiao-Jun Zhao<sup>\*a,b</sup>

*<sup>a</sup>Key Laboratory of Inorganic-Organic Hybrid Functional Material Chemistry, Ministry of Education, Tianjin Key Laboratory of Structure and Performance for Functional Molecules, Tianjin Normal University, Tianjin 300387, People's Republic of China*

*<sup>b</sup>Department of Chemistry, Collaborative Innovation Center of Chemical Science and Engineering, Nankai University, Tianjin 300071, People's Republic of China*

\*Corresponding author

E-mail address: encui\_yang@163.com & xiaojun\_zhao15@163.com

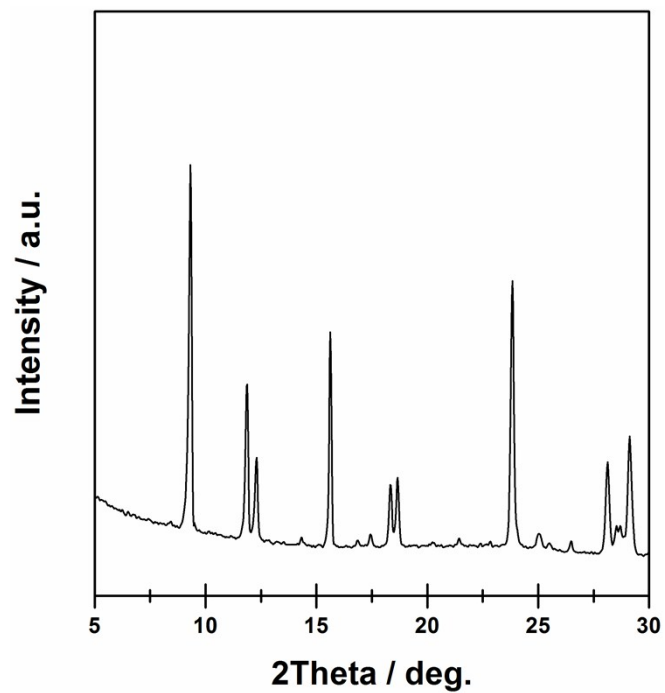

**Fig. S1** XRD patterns of as-synthesized Ni-MOF.

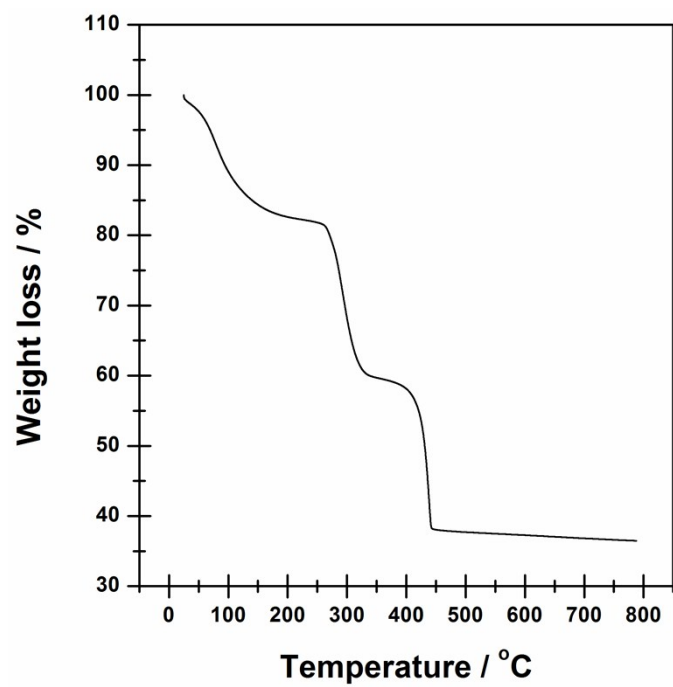

**Fig. S2** TGA curve of as-synthesized Ni-MOF

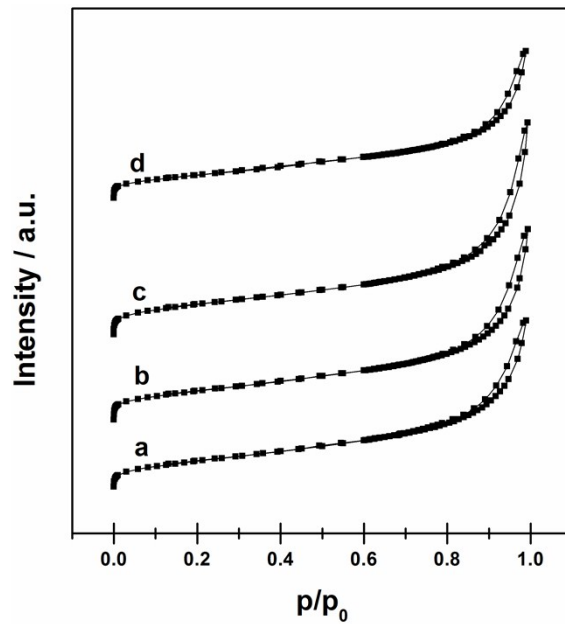

**Fig. S3** N<sub>2</sub> adsorption-desorption isotherms of Ni@C-450 (a), Ni@C-550 (b), Ni@C-650 (c), and Ni@C-750 (d).

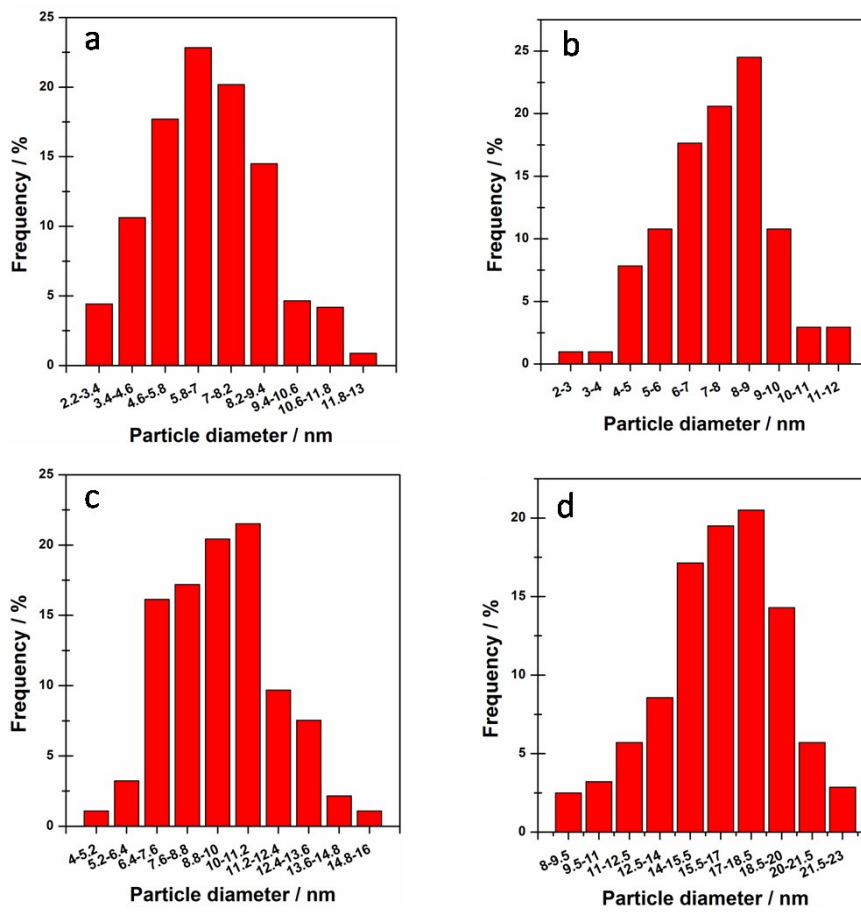

**Fig. S4** The size distribution of Ni nanoparticles in Ni@C-450 (a), Ni@C-550 (b), Ni@C-650, and Ni@C-750.

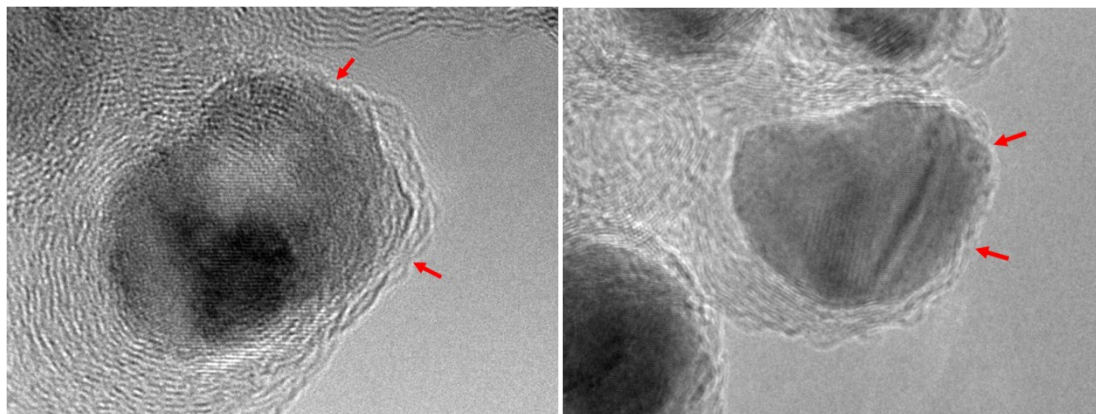

**Fig. S5** HRTEM images of individual Ni nanoparticles covered by thin carbon layers with cracks marked by red arrow.

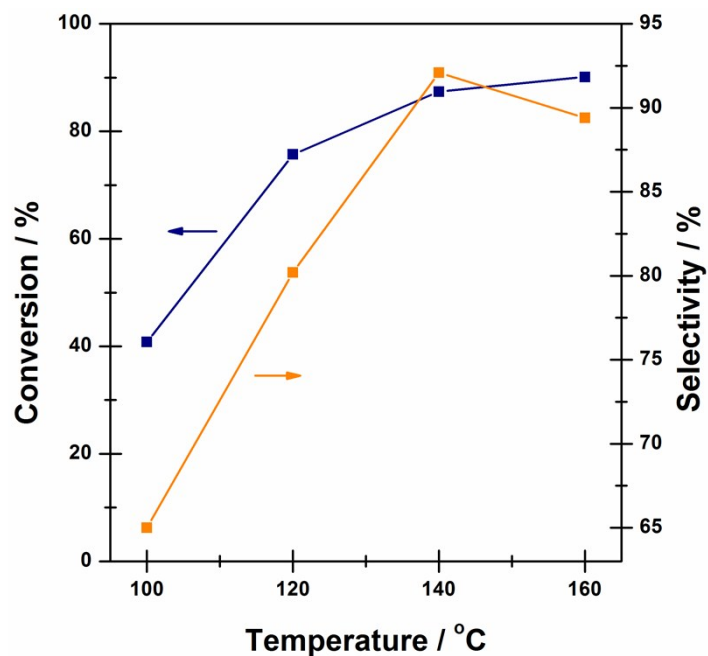

**Fig. S6** Effect of temperature on the hydrogenation of *o*-chloronitrobenzene. Reaction conditions: 0.63 mmol *o*-chloronitrobenzene, 10 mL C<sub>2</sub>H<sub>5</sub>OH, 0.5 Mpa H<sub>2</sub>, 0.1 g catalyst, temperature = 140 °C, reaction time = 30 min.

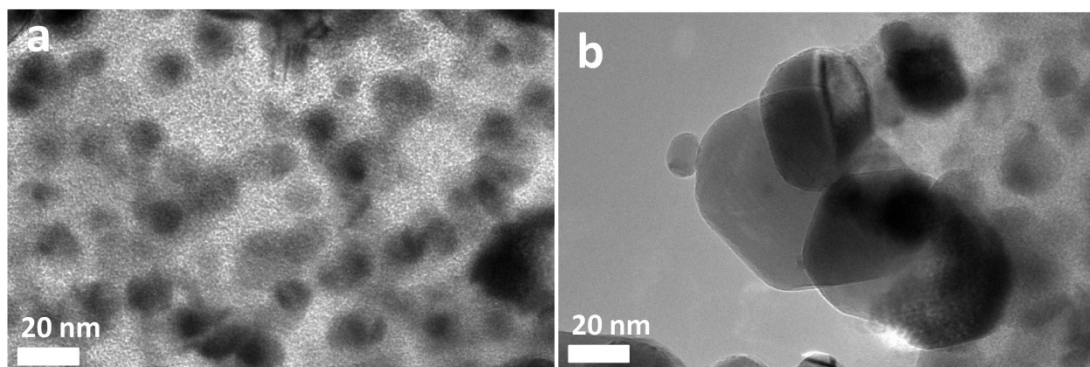

**Fig. S7** TEM images of Ni/AC before (a) and after use.

**Table S1** Effect of solvent on the hydrogenation of *o*-chloronitrobenzene<sup>a</sup>

| Entry    | Catalyst        | Solvent                          | Conversion (%) <sup>b</sup> | Selectivity (%) <sup>b</sup> |
|----------|-----------------|----------------------------------|-----------------------------|------------------------------|
| 1        | Ni@C-650        | C <sub>2</sub> H <sub>5</sub> OH | 99.4                        | 94.2                         |
| 2        | Ni@C-650        | THF                              | 20.8                        | 78.1                         |
| 3        | Ni@C-650        | Toluene                          | 18.7                        | 76.2                         |
| 4        | Ni@C-650        | DMF                              | 76.7                        | 72.1                         |
| 5        | Ni@C-650        | Dioxane                          | 23.8                        | 72.9                         |
| <b>6</b> | <b>Ni@C-650</b> | <b>THF+H<sub>2</sub>O</b>        | <b>90.5</b>                 | <b>78.5</b>                  |
| 7        | Ni@C-650        | H <sub>2</sub> O                 | 83.8                        | 65.7                         |

Reaction conditions: 0.63 mmol *o*-chloronitrobenzene, 10 mL solvent, 0.5 Mpa H<sub>2</sub>, 0.1 g catalyst, temperature = 140 °C, reaction time = 40 min. <sup>b</sup> Experimental accuracy of ±2% from GC analysis.
